# Supplementary material
Source: publisher figshare collection journal article supplement (https://sage.figshare.com/ndownloader/files/16406918)

Supplementary Figures 1a-c. *Distribution of Compensation (SF1a), Masking (SF1b) and Assimilation (SF1c) subscale scores in Autistic (above x-axis) and Non-Autistic (below x-axis) samples*

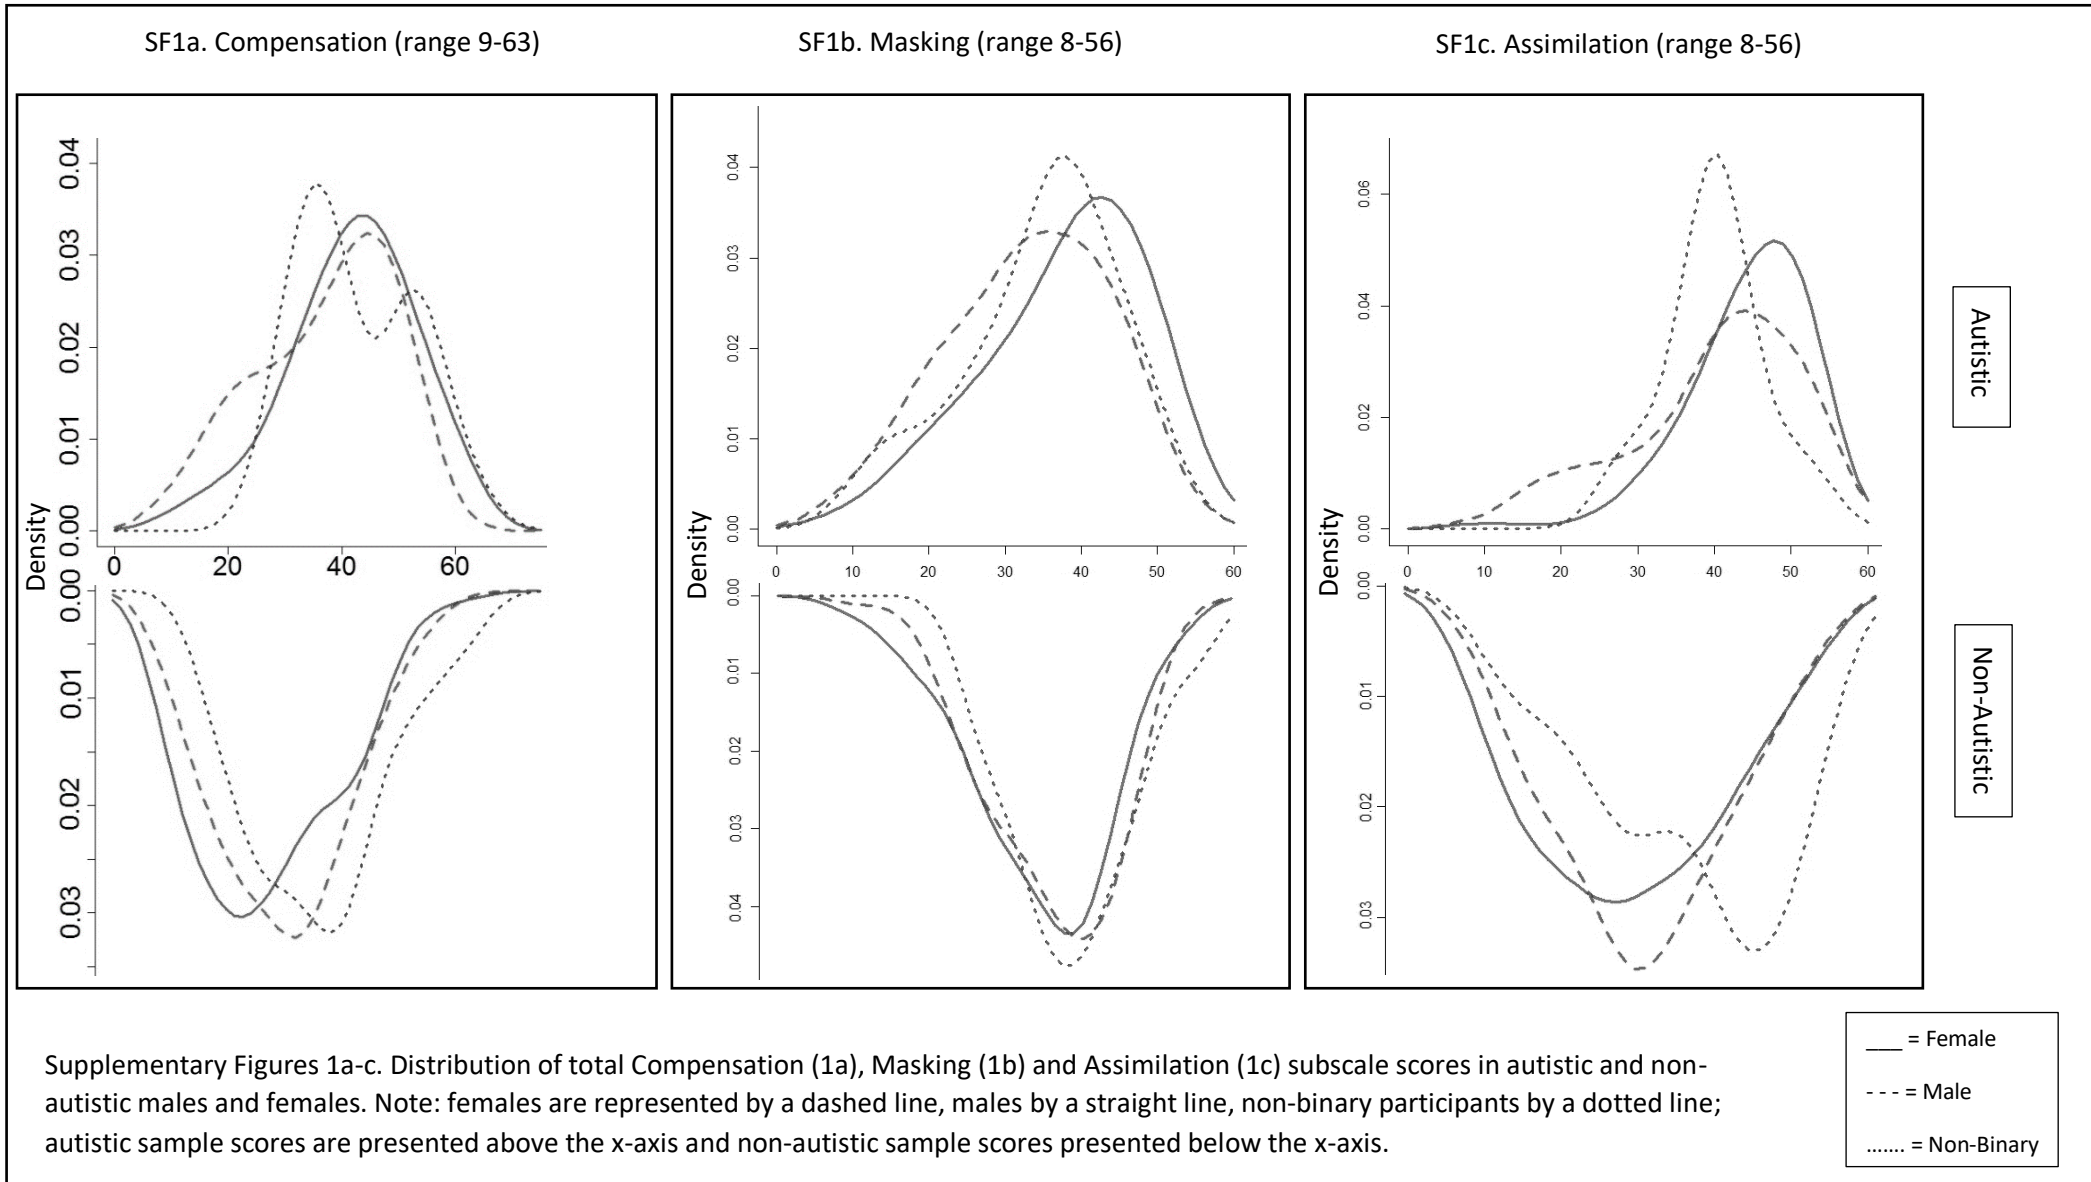

Supplement: Supplementary file 1 [file 16406918]
